# Supplementary material
Source: PubMed Central journal article supplement (PMC2825766)
Supplement: tableS1.pdf [file tableS1.pdf]

**Supplemental Table 1.** Differentially expressed transcripts in old (318 unique) and young (87 unique) adults 24 h after a bout of unaccustomed resistance loading.

| Function             | Common name     | Description                                                                    | Gene symbol | Old         | Young       |
|----------------------|-----------------|--------------------------------------------------------------------------------|-------------|-------------|-------------|
|                      |                 |                                                                                |             | Fold Change | Fold Change |
| Actin binding        | NM_005022       | Profilin 1                                                                     | PFN1        | 1.2         | 1.1         |
|                      | BC106020        | Family with sequence similarity 39, member B, mRNA                             | FAM39B      | -           | -1.1        |
| Amino acid transport | NM_152346       | Solute carrier family 43, member 2                                             | SLC43A2     | -1.6        | -           |
|                      | NM_003046       | Solute carrier family 7 (cationic amino acid transporter, y+ system), member 2 | SLC7A2      | -1.3        | -           |
| Apoptosis            | AF271775        | DC49 mRNA, complete cds                                                        | LOC440354   | 1.2         | -           |
|                      | NM_031279       | Alanine-glyoxylate aminotransferase 2-like 1                                   | AGXT2L1     | 2.3         | -           |
|                      | NM_014417       | BCL2 binding component 3                                                       | BBC3        | -1.2        | -           |
|                      | NM_016009       | SH3-domain GRB2-like endophilin B1                                             | SH3GLB1     | -1.1        | -           |
|                      | NM_003502       | Axin 1                                                                         | AXIN1       | 1.2         | -           |
|                      | NM_032346       | Programmed cell death 2-like                                                   | PDCD2L      | 1.2         | -           |
|                      | ENST00000369797 | Programmed cell death protein 11 (RRP5 protein homolog)                        | PDCD11      | 1.3         | -           |
|                      | NM_012396       | Pleckstrin homology-like domain, family A, member 3                            | PHLDA3      | 1.5         | -           |
| Binding              | NM_001008895    | Cullin 4A                                                                      | CUL4A       | -           | -1.2        |
|                      | NM_014061       | Melanoma antigen family H, 1                                                   | MAGEH1      | -           | 1.1         |
|                      | NM_006007       | Zinc finger, AN1-type domain 5                                                 | *ZFAND5     | -1.4        | -           |
|                      | NM_001025300    | RAB12, member RAS oncogene family                                              | RAB12       | -1.2        | -           |
|                      | NM_015483       | Kelch repeat and BTB (POZ) domain containing 2                                 | KBTBD2      | -1.2        | -           |
|                      | NM_014160       | Makorin, ring finger protein, 2                                                | MKRN2       | -1.2        | -           |
|                      | NM_019072       | Small glutamine-rich tetratricopeptide repeat (TPR)-containing, beta           | SGTB        | -1.2        | -           |
|                      | NM_024753       | Tetratricopeptide repeat domain 21B                                            | TTC21B      | -1.1        | -           |
|                      | NM_001009944    | Polycystic kidney disease 1 (autosomal dominant)                               | PKD1        | -1.1        | -           |
|                      | NM_033414       | Zinc finger protein 622                                                        | ZNF622      | 1.1         | -           |
|                      | NM_020962       | Likely ortholog of mouse neighbor of Punc E11                                  | NOPE        | 1.1         | -           |
|                      | NM_007266       | XPA binding protein 1, GTPase                                                  | XAB1        | 1.2         | -           |
|                      | NM_201280       | Muted homolog (mouse)                                                          | MUTED       | 1.2         | -           |
| ENST00000373748      | NM_025112       | ZXD family zinc finger C                                                       | ZXDC        | 1.2         | -           |
|                      | ENST00000373748 | Probable RNA-binding protein 18 (RNA-binding motif protein 18)                 | RBM18       | 1.2         | -           |
|                      | NM_015110       | Structural maintenance of chromosomes 5                                        | SMC5        | 1.3         | -           |

|                                                    |                                                  |                                                                                                     |          |      |      |
|----------------------------------------------------|--------------------------------------------------|-----------------------------------------------------------------------------------------------------|----------|------|------|
| Carbohydrate metabolism                            | NM_021203                                        | Signal recognition particle receptor, B subunit                                                     | SRPRB    | 1.4  | -    |
|                                                    | NM_032810                                        | ATPase family, AAA domain containing 1                                                              | ATAD1    | -    | 1.2  |
|                                                    | NM_015948                                        | Solute carrier family 35, member B3                                                                 | SLC35B3  | 1.2  | -    |
|                                                    | NM_032826                                        | Solute carrier family 35, member B4                                                                 | SLC35B4  | 1.2  | -    |
|                                                    | NM_018964                                        | Solute carrier family 37 (glycerol-3-phosphate transporter), member 1                               | SLC37A1  | 1.3  | -    |
|                                                    | NM_199186                                        | 2,3-bisphosphoglycerate mutase                                                                      | BPGM     | 1.5  | -    |
|                                                    | NM_005530                                        | Isocitrate dehydrogenase 3 (NAD+) alpha                                                             | *IDH3A   | 1.7  | -    |
| Cell communication<br>Cell cycle and proliferation | ENST00000229270                                  | Triosephosphate isomerase (EC 5.3.1.1)                                                              | TIM      | 1.7  | -    |
|                                                    | NM_014631                                        | SH3 and PX domains 2A                                                                               | SH3PXD2A | -    | -1.2 |
|                                                    | NM_002359                                        | v-maf musculoaponeurotic fibrosarcoma oncogene homolog G                                            | *MAFG    | -1.5 | -    |
|                                                    | NM_025195                                        | Tribbles homolog 1                                                                                  | *TRIB1   | -1.5 | -    |
|                                                    | NM_016272                                        | Transducer of ERBB2, 2                                                                              | TOB2     | -1.3 | -    |
|                                                    | NM_006185                                        | Nuclear mitotic apparatus protein 1                                                                 | NUMA1    | -1.3 | -    |
|                                                    | NM_198219                                        | Inhibitor of growth family, member 1                                                                | ING1     | -1.2 | -    |
|                                                    | NM_018719                                        | Cell division cycle associated 7-like                                                               | CDCA7L   | -1.2 | -    |
|                                                    | NM_006023                                        | Cell division cycle 123 homolog                                                                     | CDC123   | 1.1  | -    |
|                                                    | ENST00000367808                                  | Golgin 45 (Basic leucine zipper nuclear factor 1) (JEM-1) (p45 basic leucine-zipper nuclear factor) | BLZF1    | 1.1  | -    |
|                                                    | NM_001363                                        | Dyskeratosis congenita 1, dyskerin                                                                  | DKC1     | 1.2  | -    |
|                                                    | NM_032778                                        | MYC induced nuclear antigen                                                                         | MINA     | 1.3  | -    |
|                                                    | NM_006325                                        | RAN, member RAS oncogene family                                                                     | RAN      | 1.3  | -    |
|                                                    | NM_020808                                        | Signal-induced proliferation-associated 1 like 2                                                    | SIPA1L2  | 1.8  | -    |
|                                                    | NM_005978                                        | S100 calcium binding protein A2                                                                     | S100A2   | 1.8  | -    |
|                                                    | NM_001731                                        | B-cell translocation gene 1, anti-proliferative                                                     | BTG1     | -    | -1.3 |
|                                                    | NM_015330                                        | SPECC1-like                                                                                         | SPECC1L  | -    | -1.2 |
|                                                    | NM_001007793                                     | BUB3 budding uninhibited by benzimidazoles 3 homolog                                                | BUB3     | -    | 1.2  |
|                                                    | NM_001950                                        | E2F transcription factor 4, p107/p130-binding                                                       | E2F4     | -    | 1.2  |
|                                                    | NM_152858                                        | Wilms tumor 1 associated protein                                                                    | WTAP     | -    | 1.2  |
| NM_004184                                          | Tryptophanyl-tRNA synthetase                     | WARS                                                                                                | -        | 1.3  |      |
| NM_024094                                          | Defective in sister chromatid cohesion homolog 1 | DCC1                                                                                                | -        | 1.4  |      |
| CA306742                                           | UI-H-FT1-bht-f-03-0-UI.s1                        | CA306742                                                                                            | -        | 1.4  |      |
| Cell differentiation                               | NM_002522                                        | Neuronal pentraxin I                                                                                | NPTX1    | -2.4 | -    |
|                                                    | NM_182961                                        | Spectrin repeat containing, nuclear envelope 1                                                      | SYNE1    | -    | -1.3 |
|                                                    | NM_003412                                        | Zic family member 1 (odd-paired homolog)                                                            | ZIC1     | -    | -1.3 |

|                                  |                                                                                  |                                                                                                   |          |      |      |
|----------------------------------|----------------------------------------------------------------------------------|---------------------------------------------------------------------------------------------------|----------|------|------|
| Cell fusion                      | NM_004714                                                                        | Dual-specificity tyrosine-(Y)-phosphorylation regulated kinase 1B                                 | DYRK1B   | -1.4 | -    |
| Cell growth                      | NM_053044                                                                        | HtrA serine peptidase 3                                                                           | HTRA3    | -1.6 | -    |
|                                  | NM_199320                                                                        | PHD finger protein 17                                                                             | PHF17    | 1.2  | -    |
|                                  | NM_001267                                                                        | Chondroadherin                                                                                    | CHAD     | -    | -1.6 |
| Cell-cell adhesion               | NM_015669                                                                        | Protocadherin beta 5                                                                              | PCDHB5   | -1.5 | -    |
|                                  | NM_002230                                                                        | Junction plakoglobin                                                                              | JUP      | -1.5 | -    |
|                                  | NM_001903                                                                        | Catenin (cadherin-associated protein), alpha 1, 102kDa                                            | CTNNA1   | 1.2  | -    |
| Electron transport               | NM_144611                                                                        | Cytochrome b5 domain containing 2                                                                 | *CYB5D2  | -1.2 | -    |
|                                  | NM_024028                                                                        | Prenylcysteine oxidase 1 like                                                                     | PCYOX1L  | 1.2  | -    |
|                                  | NM_004109                                                                        | Ferredoxin 1                                                                                      | FDX1     | 1.2  | -    |
|                                  | NM_004718                                                                        | Cytochrome c oxidase subunit VIIa polypeptide 2 like                                              | COX7A2L  | -    | 1.3  |
|                                  | NM_007022                                                                        | Cytochrome b-561 domain containing 2                                                              | CYB561D2 | -    | 1.3  |
| Growth factor activity           | NM_001001555                                                                     | Growth factor receptor-bound protein 10                                                           | GRB10    | -    | -1.6 |
|                                  | NM_000875                                                                        | Insulin-like growth factor 1 receptor                                                             | IGF1R    | -    | -1.4 |
|                                  | NM_004113                                                                        | Fibroblast growth factor 12                                                                       | FGF12    | -    | 1.3  |
| Inflammatory and stress response | NM_005952                                                                        | Metallothionein 1X                                                                                | *MT1X    | -2.1 | -    |
|                                  | NM_005950                                                                        | Metallothionein 1G                                                                                | MT1G     | -2.0 | -    |
|                                  | NM_005951                                                                        | Metallothionein 1H                                                                                | MT1H     | -1.8 | -    |
|                                  | NM_003407                                                                        | Zinc finger protein 36, C3H type, homolog                                                         | ZFP36    | -1.5 | -    |
|                                  | NM_001718                                                                        | Bone morphogenetic protein 6                                                                      | BMP6     | -1.5 | -    |
|                                  | NM_000024                                                                        | Adrenergic, beta-2-, receptor, surface                                                            | ADRB2    | -1.4 | -    |
|                                  | NM_005947                                                                        | Metallothionein 1B                                                                                | MT1B     | -1.4 | -    |
|                                  | NM_005946                                                                        | Metallothionein 1A                                                                                | MT1A     | -1.4 | -    |
|                                  | NM_003072                                                                        | SWI/SNF related, matrix associated, actin dependent regulator of chromatin, subfamily a, member 4 | SMARCA4  | 1.2  | -    |
|                                  | NM_014888                                                                        | Family with sequence similarity 3, member C                                                       | *FAM3C   | 1.2  | -    |
|                                  | NM_032242                                                                        | Plexin A1                                                                                         | PLXNA1   | 1.3  | -    |
|                                  | NM_017413                                                                        | Apelin, AGTRL1 ligand                                                                             | APLN     | 1.3  | -    |
|                                  | NM_032271                                                                        | TNF receptor-associated factor 7                                                                  | TRAF7    | 1.3  | -    |
|                                  | NM_014143                                                                        | CD274 molecule                                                                                    | CD274    | 1.3  | -    |
|                                  | NM_004134                                                                        | Heat shock 70kDa protein 9                                                                        | HSPA9    | 1.3  | -    |
|                                  | NM_005923                                                                        | Mitogen-activated protein kinase kinase kinase 5                                                  | MAP3K5   | 1.4  | -    |
| NM_213662                        | Signal transducer and activator of transcription 3 (acute-phase response factor) | STAT3                                                                                             | 1.4      | -    |      |

|                         |              |                                                                                |         |      |     |
|-------------------------|--------------|--------------------------------------------------------------------------------|---------|------|-----|
|                         | NM_002157    | Heat shock 10kDa protein 1 (chaperonin 10)                                     | HSPE1   | 1.4  | -   |
|                         | NM_000595    | Lymphotoxin alpha (TNF superfamily, member 1)                                  | LTA     | 1.4  | -   |
|                         | NM_001540    | Heat shock 27kDa protein 1                                                     | *HSPB1  | 1.5  | -   |
|                         | NM_006644    | Heat shock 105kDa/110kDa protein 1                                             | HSPH1   | 1.6  | -   |
|                         | NM_145109    | Mitogen-activated protein kinase kinase 3                                      | *MAP2K3 | 1.7  | -   |
|                         | NM_003498    | Stannin                                                                        | SNN     | 1.7  | -   |
|                         | NM_002218    | Inter-alpha (globulin) inhibitor H4 (plasma Kallikrein-sensitive glycoprotein) | ITIH4   | 1.7  | -   |
|                         | NM_015368    | Pannexin 1                                                                     | PANX1   | 2.9  | -   |
|                         | NM_016614    | TRAF and TNF receptor associated protein                                       | TTRAP   | -    | 1.2 |
|                         | NM_004528    | Microsomal glutathione S-transferase 3                                         | MGST3   | -    | 1.2 |
|                         | NM_005527    | Heat shock 70kDa protein 1-like                                                | HSPA1L  | -    | 1.4 |
|                         | NM_004832    | Glutathione S-transferase omega 1                                              | GSTO1   | -    | 1.4 |
| Intracellular organelle | NM_144570    | Hematological and neurological expressed 1-like                                | HN1L    | 1.2  | -   |
|                         | NM_014182    | ORM1-like 2                                                                    | ORMDL2  | 1.2  | -   |
|                         | NM_032357    | Coiled-coil domain containing 115                                              | CCDC115 | 1.3  | -   |
|                         | NM_014184    | Cornichon homolog 4                                                            | CNIH4   | 1.5  | -   |
|                         | NM_015942    | MTERF domain containing 1                                                      | MTERFD1 | na   | -   |
| Ion Transport           | NM_213649    | Sideroflexin 4                                                                 | SFXN4   | 1.2  | -   |
|                         | NM_001002234 | Sodium channel modifier 1                                                      | *SCNM1  | 1.3  | -   |
|                         | NM_004594    | Solute carrier family 9 (sodium/hydrogen exchanger), member 5                  | SLC9A5  | 1.3  | -   |
|                         | NM_021095    | Solute carrier family 5 (sodium-dependent vitamin transporter), member 6       | SLC5A6  | 1.4  | -   |
| Kinase activity         | NM_138809    | Carboxymethylenebutenolidase homolog                                           | CMBL    | -1.7 | -   |
|                         | AB023218     | ARYLSULFATASE G                                                                | ARSG    | 1.2  | -   |
|                         | NM_002601    | Phosphodiesterase 6D, cGMP-specific, rod, delta                                | PDE6D   | 1.2  | -   |
|                         | NM_148912    | Abhydrolase domain containing 11                                               | ABHD11  | 1.3  | -   |
|                         | NM_144589    | Catechol-O-methyltransferase domain containing 1                               | COMTD1  | 1.7  | -   |
| Lipid metabolism        | NM_017431    | Protein kinase, AMP-activated, gamma 3 non-catalytic subunit                   | PRKAG3  | -1.6 | -   |
|                         | NM_032717    | Lung cancer metastasis-associated protein                                      | MAG1    | -1.6 | -   |
|                         | NM_004650    | Patatin-like phospholipase domain containing 4                                 | PNPLA4  | -1.2 | -   |
|                         | NM_032737    | Lamin B2                                                                       | LMNB2   | 1.2  | -   |
|                         | NM_021727    | Fatty acid desaturase 3                                                        | FADS3   | 1.2  | -   |

|                      |              |                                                                           |          |      |      |
|----------------------|--------------|---------------------------------------------------------------------------|----------|------|------|
|                      | NM_014754    | Phosphatidylserine synthase 1                                             | PTDSS1   | 1.2  | -    |
|                      | AK091528     | cDNA FLJ34209 fis, clone FCBBF3020599                                     | AK091528 | 1.2  | -    |
|                      | NM_016203    | Protein kinase, AMP-activated, gamma 2 non-catalytic subunit              | PRKAG2   | 1.5  | -    |
| Localization         | NM_006854    | KDEL (Lys-Asp-Glu-Leu) endoplasmic reticulum protein retention receptor 2 | KDELR2   | 1.2  | -    |
|                      | NM_007097    | Clathrin, light chain (Lcb)                                               | CLTB     | 1.2  | -    |
|                      | NM_020845    | Phosphatidylinositol transfer protein, membrane-associated 2              | PITPNM2  | 1.2  | -    |
|                      | NM_004604    | Syntaxin 4                                                                | STX4     | 1.2  | -    |
|                      | NM_181519    | Synaptotagmin XV                                                          | SYT15    | 1.2  | -    |
|                      | AK126587     | chromosome 3 open reading frame 31                                        | *C3orf31 | 1.2  | -    |
|                      | NM_001079537 | Trafficking protein particle complex 6B                                   | TRAPPC6B | 1.3  | -    |
|                      | NM_006335    | Translocase of inner mitochondrial membrane 17 homolog A                  | TIMM17A  | 1.3  | -    |
|                      | NM_016000    | tRNA nucleotidyl transferase, CCA-adding, 1                               | TRNT1    | 1.4  | -    |
|                      | NM_002871    | RAB interacting factor                                                    | *RABIF   | 1.4  | -    |
| Membrane constituent | NM_002264    | Karyopherin alpha 1 (importin alpha 5)                                    | KPNA1    | 1.5  | -    |
|                      | NM_153342    | Transmembrane protein 150                                                 | TMEM150  | -1.5 | -    |
|                      | NM_024074    | Transmembrane protein 38A                                                 | TMEM38A  | -1.3 | -    |
|                      | NM_018202    | Transmembrane protein 57                                                  | TMEM57   | -1.2 | -    |
|                      | NM_018475    | Transmembrane protein 165                                                 | *TMEM165 | 1.2  | -    |
|                      | NM_024334    | Transmembrane protein 43                                                  | TMEM43   | 1.4  | -    |
|                      | NM_178545    | Transmembrane protein 52                                                  | TMEM52   | -    | -2.0 |
|                      | NM_020698    | Transmembrane and coiled-coil domain family 3                             | TMCC3    | -    | -1.2 |
|                      | NM_001040431 | Coiled-coil domain containing 56                                          | CCDC56   | -    | 1.2  |
|                      | NM_199337    | Homo sapiens transmembrane protein 179B                                   | TMEM179B | -    | 1.2  |
|                      | NM_018126    | Transmembrane protein 33                                                  | TMEM33   | -    | 1.2  |
|                      | NM_015379    | Brain protein I3                                                          | BRI3     | -    | 1.2  |
|                      | NM_030567    | Proline rich 7                                                            | PRR7     | -    | 1.7  |
| Membrane transport   | NM_147152    | Intersectin 2                                                             | ITSN2    | -1.3 | -    |
|                      | NM_003916    | Adaptor-related protein complex 1, sigma 2 subunit                        | AP1S2    | 1.2  | -    |
|                      | NM_018303    | Exocyst complex component 2                                               | EXOC2    | 1.2  | -    |
|                      | NM_007247    | AP1 gamma subunit binding protein 1                                       | AP1GBP1  | 1.3  | -    |
|                      | NM_182924    | MICAL-like 2                                                              | MICALL2  | 1.8  | -    |

|                                                                                              |              |                                                                         |          |      |      |
|----------------------------------------------------------------------------------------------|--------------|-------------------------------------------------------------------------|----------|------|------|
|                                                                                              | NM_020689    | Solute carrier family 24 (sodium/potassium/calcium exchanger), member 3 | SLC24A3  | -    | -1.6 |
|                                                                                              | NM_173039    | Aquaporin 11                                                            | AQP11    | -    | 1.5  |
| Metal ion binding                                                                            | NM_016953    | Phosphodiesterase 11A                                                   | *PDE11A  | -2.5 | -    |
|                                                                                              | NM_144650    | Alcohol dehydrogenase, iron containing, 1                               | ADHFE1   | -1.4 | -    |
|                                                                                              | NM_153367    | Chromosome 10 open reading frame 56                                     | C10orf56 | -1.3 | -    |
|                                                                                              | NM_014214    | Inositol(myo)-1(or 4)-monophosphatase 2                                 | IMPA2    | -1.2 | -    |
|                                                                                              | NM_144604    | Conserved nuclear protein NHN1                                          | NHN1     | -1.1 | -    |
|                                                                                              | NM_203288    | Retinitis pigmentosa 9 (autosomal dominant)                             | RP9      | 1.2  | -    |
|                                                                                              | NM_031435    | THAP domain containing, apoptosis associated protein 2                  | THAP2    | 1.4  | -    |
| Development                                                                                  | NM_001746    | Calnexin                                                                | CANX     | 1.2  | -    |
|                                                                                              | NM_003741    | Chordin                                                                 | *CHRD    | 1.2  | -    |
|                                                                                              | NM_133265    | Angiomotin                                                              | AMOT     | 1.4  | -    |
|                                                                                              | NM_001463    | Frizzled-related protein                                                | *FRZB    | 1.4  | -    |
|                                                                                              | NM_003873    | Neuropilin 1                                                            | NRP1     | 1.5  | -    |
| Muscle contraction                                                                           | NM_000727    | Calcium channel, voltage-dependent, gamma subunit 1                     | CACNG1   | -1.3 | -    |
|                                                                                              | NM_001033580 | Myosin head domain containing 1                                         | MYOHD1   | 1.4  | -    |
|                                                                                              | NM_014332    | Small muscle protein, X-linked                                          | SMPX     | 1.5  | -    |
| Muscle development                                                                           | NM_004543    | Nebulin                                                                 | NEB      | 1.2  | -    |
|                                                                                              | NM_003476    | Cysteine and glycine-rich protein 3 (cardiac LIM protein)               | CSRP3    | 1.4  | -    |
| Nucleoside-triphosphatase activity                                                           | NM_025188    | Tripartite motif-containing 45                                          | TRIM45   | -1.2 | -    |
|                                                                                              | NM_006503    | Proteasome (prosome, macropain) 26S subunit, ATPase, 4                  | PSMC4    | 1.2  | -    |
|                                                                                              | NM_012141    | Integrator complex subunit 6                                            | INTS6    | 1.3  | -    |
|                                                                                              | NM_032116    | Katanin p60 subunit A-like 1                                            | KATNAL1  | 1.4  | -    |
| Positive regulation of nucleobase, nucleoside, nucleotide and nucleic acid metabolic process | NM_007162    | Transcription factor EB                                                 | TFEB     | -1.4 | -    |
|                                                                                              | NM_002228    | Jun oncogene                                                            | JUN      | -1.4 | -    |
|                                                                                              | NM_005121    | Thyroid hormone receptor associated protein 1                           | THRAP1   | -1.3 | -    |
|                                                                                              | NM_002486    | Nuclear cap binding protein subunit 1, 80kDa                            | NCBP1    | 1.2  | -    |

|                     |                 |                                                                                       |           |      |      |
|---------------------|-----------------|---------------------------------------------------------------------------------------|-----------|------|------|
| Metabolic processes | NM_052937       | Protein-L-isoaspartate (D-aspartate) O-methyltransferase domain containing 1          | *PCMTD1   | -1.6 | -    |
|                     | H40632          | H40632 yp50g01.s1 Soares retina N2b4HR                                                | H40632    | -1.5 | -    |
|                     | NM_012229       | 5'-nucleotidase, cytosolic II                                                         | NT5C2     | -1.4 | -    |
|                     | NM_203356       | CTAGE family, member 5                                                                | *CTAGE5   | -1.3 | -    |
|                     | BM983822        | BM983822 UI-CF-DU1-aay-e-18-0-UI.s1 UI-CF-DU1                                         | BM983822  | -1.2 | -    |
|                     | NM_139174       | Testis nuclear RNA-binding protein-like                                               | LOC161931 | -1.1 | -    |
|                     | NM_017755       | NOL1/NOP2/Sun domain family, member 2                                                 | NSUN2     | 1.2  | -    |
|                     | NM_005443       | 3'-phosphoadenosine 5'-phosphosulfate synthase 1                                      | PAPSS1    | 1.2  | -    |
|                     | NM_018590       | Chondroitin sulfate GalNAcT-2                                                         | GALNACT-2 | 1.2  | -    |
|                     | NM_003137       | SFRS protein kinase 1                                                                 | SRPK1     | 1.3  | -    |
|                     | NM_181597       | Uridine phosphorylase 1                                                               | UPP1      | 1.4  | -    |
|                     | NM_032356       | LSM domain containing 1                                                               | LSMD1     | 1.5  | -    |
|                     | NM_203467       | Peptidylprolyl isomerase (cyclophilin)-like 5                                         | PPIL5     | 1.6  | -    |
|                     | AK123066        | cDNA FLJ41071 fis, clone 3NB692003538                                                 | AK123066  | 1.8  | -    |
| Muscle maintenance  | NM_021204       | Enolase-phosphatase 1                                                                 | ENOPH1    | 1.1  | -    |
|                     | NM_014317       | Prenyl (decaprenyl) diphosphate synthase, subunit 1                                   | PDSS1     | 1.4  | -    |
|                     | ENST00000379534 | Mitochondrial ornithine transporter 1 (Solute carrier family 25 member 15)            | SLC25A15  | 1.5  | -    |
|                     | NM_004737       | Like-glycosyltransferase                                                              | LARGE     | 1.5  | -    |
|                     | NM_145177       | Dehydrogenase/reductase (SDR family) X-linked                                         | DHRX      | -    | 1.3  |
|                     | NM_014065       | Asteroid homolog 1                                                                    | ASTE1     | -    | 1.3  |
| Protein binding     | NM_007178       | Serine/threonine kinase receptor associated protein                                   | *STRAP    | 1.2  | -    |
|                     | NM_001268       | Regulator of chromosome condensation (RCC1) and BTB (POZ) domain containing protein 2 | RCBTB2    | -    | -1.3 |
| Proteolysis         | NM_001333       | Cathepsin L2                                                                          | CTSL2     | -1.5 | -    |
|                     | NM_003342       | Ubiquitin-conjugating enzyme E2G 1                                                    | UBE2G1    | -1.4 | -    |
|                     | NM_152586       | Ubiquitin specific peptidase 54                                                       | USP54     | -1.3 | -    |
|                     | NM_019116       | Ubiquitin family domain containing 1                                                  | UBFD1     | -1.2 | -    |
|                     | NM_006292       | Tumor susceptibility gene 101                                                         | TSG101    | 1.2  | -    |
|                     | NM_022488       | ATG3 autophagy related 3 homolog                                                      | ATG3      | 1.2  | -    |
|                     | NM_052936       | ATG4 autophagy related 4 homolog A                                                    | ATG4A     | 1.3  | -    |
|                     | NM_173060       | Calpastatin                                                                           | CAST      | 1.3  | -    |
|                     | NM_017824       | Membrane-associated ring finger (C3HC4) 5                                             | MARCH5    | 1.3  | -    |
|                     | NM_173497       | HECT domain containing 2                                                              | HECTD2    | 1.3  | -    |
|                     | NM_020886       | Ubiquitin specific peptidase 28                                                       | USP28     | 1.5  | -    |

|                                   |           |                                                                    |           |      |      |
|-----------------------------------|-----------|--------------------------------------------------------------------|-----------|------|------|
|                                   | NM_014814 | Proteasome (prosome, macropain) 26S subunit, non-ATPase, 6         | PSMD6     | -    | 1.2  |
| Protein metabolism                | NM_130853 | Protein tyrosine phosphatase, receptor type, S                     | PTPRS     | -    | -1.3 |
|                                   | NM_152673 | Mucin 20, cell surface associated                                  | MUC20     | -    | -1.3 |
|                                   | NM_014683 | Unc-51-like kinase 2                                               | ULK2      | -    | -1.2 |
|                                   | NM_012235 | SREBF chaperone                                                    | SCAP      | -    | 1.1  |
|                                   | NM_003193 | Tubulin folding cofactor E                                         | TBCE      | -    | 1.1  |
|                                   | NM_030768 | Integrin-linked kinase-associated serine/threonine phosphatase 2C  | ILKAP     | -    | 1.2  |
| Protein modification              | BC020242  | Protein tyrosine phosphatase, mitochondrial 1                      | PTPMT1    | -    | 1.2  |
|                                   | NM_014665 | Leucine rich repeat containing 14                                  | LRRC14    | -    | 1.3  |
|                                   | NM_001084 | Procollagen-lysine, 2-oxoglutarate 5-dioxygenase 3                 | PLOD3     | 1.1  | -    |
|                                   | NM_000113 | Torsin family 1, member A                                          | TOR1A     | 1.2  | -    |
|                                   | NM_030752 | T-complex 1                                                        | TCP1      | 1.3  | -    |
|                                   | NM_012073 | Chaperonin containing TCP1, subunit 5 (epsilon)                    | *CCT5     | 1.4  | -    |
| Ribosomal biogenesis and assembly | NM_018428 | UTP6, small subunit (SSU) processome component, homolog            | UTP6      | 1.2  | -    |
| RNA recognition motif, RNP-2      | NM_014473 | DIM1 dimethyladenosine transferase 1-like                          | DIMT1L    | 1.2  | -    |
|                                   | NM_002568 | Poly(A) binding protein, cytoplasmic 1                             | *PABPC1   | -1.2 | -    |
| RNA splicing                      | NM_004643 | Poly(A) binding protein, nuclear 1                                 | *PABPN1   | -1.1 | -    |
|                                   | NM_002092 | G-rich RNA sequence binding factor 1                               | GRSF1     | 1.1  | -    |
|                                   | NM_032361 | THO complex 3                                                      | THOC3     | -    | -1.1 |
| Signaling                         | NM_006625 | FUS interacting protein (serine/arginine-rich) 1                   | FUSIP1    | -    | 1.3  |
|                                   | NM_000272 | Nephronophthisis 1                                                 | NPHP1     | -1.6 | -    |
|                                   | NM_022783 | DEP domain containing 6                                            | DEPDC6    | -1.5 | -    |
|                                   | NM_015071 | Rho GTPase activating protein 26                                   | ARHGAP26  | -1.4 | -    |
|                                   | NM_003565 | Unc-51-like kinase 1                                               | ULK1      | -1.3 | -    |
|                                   | NM_005619 | Reticulon 2                                                        | RTN2      | -1.2 | -    |
|                                   | NM_004157 | Protein kinase, cAMP-dependent, regulatory, type II, alpha         | PRKAR2A   | -1.1 | -    |
|                                   | NM_032293 | GTPase activating Rap/RanGAP domain-like 3                         | GARNL3    | 1.3  | -    |
|                                   | NM_138689 | Protein phosphatase 1, regulatory (inhibitor) subunit 14B          | *PPP1R14B | 1.4  | -    |
|                                   | NM_003665 | Ficolin (collagen/fibrinogen domain containing) 3 (Hakata antigen) | FCN3      | 1.5  | -    |
|                                   | NM_006065 | Signal-regulatory protein beta 1                                   | SIRPB1    | 1.6  | -    |



|                      |               |                                                                                                                                 |                                                          |        |      |     |
|----------------------|---------------|---------------------------------------------------------------------------------------------------------------------------------|----------------------------------------------------------|--------|------|-----|
| Structural integrity | NM_000092     | Collagen, type IV, alpha 4                                                                                                      | COL4A4                                                   | -1.7   | -    |     |
|                      | NM_000091     | Collagen, type IV, alpha 3 (Goodpasture antigen)                                                                                | COL4A3                                                   | -1.7   | -    |     |
|                      | NM_020987     | Ankyrin 3, node of Ranvier (ankyrin G)                                                                                          | *ANK3                                                    | -1.4   | -    |     |
|                      | NM_025074     | Fraser syndrome 1                                                                                                               | FRAS1                                                    | -1.2   | -    |     |
|                      | NM_000232     | Sarcoglycan, beta                                                                                                               | SGCB                                                     | -1.2   | -    |     |
|                      | NM_018943     | Tubulin, alpha 8                                                                                                                | TUBA8                                                    | 1.6    | 1.2  |     |
|                      | BC012204      | Fibronectin type III domain containing 3B                                                                                       | FNDC3B                                                   | 1.6    | -    |     |
|                      | BX113452      | BX113452 Soares infant brain 1NIB                                                                                               | BX113452                                                 | 1.6    | -    |     |
|                      | NM_004997     | Myosin binding protein H                                                                                                        | MYBPH                                                    | 4.1    | -    |     |
|                      | NM_024668     | Ankyrin repeat and KH domain containing 1                                                                                       | ANKHD1                                                   | -      | 1.3  |     |
|                      | NM_079836     | Tubulin, alpha 3c                                                                                                               | TUBA3C                                                   | -      | 1.4  |     |
|                      | NM_006000     | Tubulin, alpha 4a                                                                                                               | TUBA4A                                                   | -      | 1.4  |     |
|                      | Transcription | NM_005253                                                                                                                       | FOS-like antigen 2                                       | FOSL2  | -1.4 | -   |
|                      |               | NM_201999                                                                                                                       | E74-like factor 2 (ets domain transcription factor)      | ELF2   | -1.3 | -   |
|                      |               | NM_003082                                                                                                                       | Small nuclear RNA activating complex, polypeptide 1      | SNAPC1 | -1.3 | -   |
| NM_022841            |               | Regulatory factor X domain containing 2                                                                                         | RFXDC2                                                   | -1.3   | -    |     |
| NM_006164            |               | Nuclear factor (erythroid-derived 2)-like 2                                                                                     | NFE2L2                                                   | -1.2   | -    |     |
| NM_016423            |               | Zinc finger protein 219                                                                                                         | ZNF219                                                   | -1.1   | -    |     |
| AK027214             |               | CCR4-NOT transcription complex, subunit 6-like                                                                                  | CNOT6L                                                   | -1.1   | -    |     |
| NM_015694            |               | Zinc finger protein 777                                                                                                         | ZNF777                                                   | -1.1   | -    |     |
| AK057670             |               | general transcription factor II, i                                                                                              | GTF2I                                                    | 1.1    | -    |     |
| NM_024863            |               | Transcription elongation factor A (SII)-like 4                                                                                  | TCEAL4                                                   | 1.1    | -    |     |
| NM_032438            |               | I(3)mbt-like 3                                                                                                                  | L3MBTL3                                                  | 1.2    | -    |     |
| NM_006828            |               | Activating signal cointegrator 1 complex subunit 3                                                                              | ASCC3                                                    | 1.2    | -    |     |
| ENST00000316634      |               | snRNA-activating protein complex subunit 5                                                                                      | SNAPC5                                                   | 1.2    | -    |     |
| NM_031370            |               | Heterogeneous nuclear ribonucleoprotein D (AU-rich element RNA binding protein 1, 37kDa)                                        | HNRPD                                                    | 1.2    | -    |     |
| NM_024341            |               | Zinc finger protein 557                                                                                                         | ZNF557                                                   | 1.2    | -    |     |
| NM_020863            |               | ZFAT zinc finger 1                                                                                                              | ZFAT1                                                    | 1.3    | -    |     |
| NM_014950            |               | Zinc finger and BTB domain containing 1                                                                                         | ZBTB1                                                    | -      | -1.4 |     |
| AK130071             |               | ZBTB44 zinc finger and BTB domain containing 44                                                                                 | ZBTB44                                                   | -      | -1.3 |     |
| NM_003434            |               | Zinc finger protein 133                                                                                                         | ZNF133                                                   | -      | -1.2 |     |
| BC014095             |               | V-rel reticuloendotheliosis viral oncogene homolog A, nuclear factor of kappa light polypeptide gene enhancer in B-cells 3, p65 | RELA                                                     | -      | 1.2  |     |
| Translation          |               | NM_012086                                                                                                                       | General transcription factor IIIC, polypeptide 3, 102kDa | GTF3C3 | -    | 1.2 |
|                      |               | NM_000992                                                                                                                       | Ribosomal protein L29                                    | RPL29  | -1.1 | -   |

|           |              |                                                                              |              |      |   |
|-----------|--------------|------------------------------------------------------------------------------|--------------|------|---|
|           | NM_013234    | Eukaryotic translation initiation factor 3, subunit 12                       | EIF3S12      | 1.1  | - |
|           | NM_014175    | Mitochondrial ribosomal protein L15                                          | MRPL15       | 1.1  | - |
|           | NM_139242    | Mitochondrial methionyl-tRNA formyltransferase                               | MTFMT        | 1.2  | - |
|           | NM_007208    | Mitochondrial ribosomal protein L3                                           | MRPL3        | 1.2  | - |
|           | NM_018135    | Mitochondrial ribosomal protein S18A                                         | MRPS18A      | 1.2  | - |
|           | NM_172195    | Eukaryotic translation initiation factor 2B, subunit 4 delta, 67kDa          | EIF2B4       | 1.3  | - |
|           | NM_020409    | Mitochondrial ribosomal protein L47                                          | MRPL47       | 1.3  | - |
|           | BC015230     | Peptidyl-tRNA hydrolase 1 homolog                                            | PTRH1        | 1.3  | - |
|           | NM_001968    | Eukaryotic translation initiation factor 4E                                  | *EIF4E       | 1.4  | - |
|           | NM_031464    | Ribosomal protein S6 kinase-like 1                                           | RPS6KL1      | 1.5  | - |
| WD repeat | NM_017818    | WD repeat domain 8                                                           | WDR8         | 1.2  | - |
|           | NM_005452    | WD repeat domain 46                                                          | WDR46        | 1.4  | - |
|           | NM_004704    | RRP9, small subunit (SSU) processome component, homolog                      | RRP9         | 1.4  | - |
|           | NM_181340    | WD repeat domain 21A                                                         | *WDR21A      | 1.5  | - |
| Unknown   | NM_053282    | SH2 domain containing 1B                                                     | SH2D1B       | -1.9 | - |
|           | BC064430     | cDNA clone IMAGE:5763979                                                     | LOC205251    | -1.9 | - |
|           | NM_023076    | Chromosome 16 open reading frame 28                                          | C16orf28     | -1.5 | - |
|           | THC2727226   | Q2PDG6_FUGRU (Q2PDG6) Interleukin-20, partial (7%)                           | THC2727226   | -1.4 | - |
|           | A_32_P197393 | Unknown                                                                      | A_32_P197393 | -1.3 | - |
|           | BC070363     | cDNA clone IMAGE:3960708, partial cds                                        | *BC070363    | -1.3 | - |
|           | NM_019099    | Chromosome 1 open reading frame 183                                          | C1orf183     | -1.3 | - |
|           | A_32_P142521 | Unknown                                                                      | A_32_P142521 | -1.3 | - |
|           | BE766438     | BE766438 IL3-NT0104-020800-232-E09 NT0104                                    | BE766438     | -1.3 | - |
|           | AM393308     | Synthetic construct Homo sapiens mRNA for hypothetical protein (KLHDC6 gene) | AM393308     | -1.3 | - |
|           | BE175081     | BE175081 QV2-HT0577-250400-166-d10 HT0577                                    | BE175081     | -1.2 | - |
|           | THC2557016   | Q3F710_9BURK (Q3F710) Inner-membrane translocator, partial (6%)              | THC2557016   | -1.2 | - |
|           | NM_018169    | Chromosome 12 open reading frame 35                                          | C12orf35     | -1.2 | - |
|           | AL133018     | mRNA; cDNA DKFZp434F0327 (from clone DKFZp434F0327)                          | AL133018     | -1.2 | - |
|           | A_24_P641673 | Unknown                                                                      | A_24_P641673 | -1.2 | - |
|           | BC033983     | cDNA clone IMAGE:5295564                                                     | BC033983     | -1.2 | - |
|           | AF338232     | CTAGE-4 protein                                                              | *CTAGE4      | -1.2 | - |

|              |                                                                                           |              |      |   |
|--------------|-------------------------------------------------------------------------------------------|--------------|------|---|
| NM_144962    | Phosphatidylethanolamine-binding protein 4                                                | PEBP4        | -1.2 | - |
| THC2546372   | Q5I0G0_HUMAN (Q5I0G0) Ribosomal protein L3, isoform a, partial (82%)                      | THC2546372   | -1.2 | - |
| BC043153     | CTAGE family, member 6                                                                    | CTAGE6       | -1.2 | - |
| BX107836     | BX107836 Soares_fetal_heart_NbHH19W                                                       | BX107836     | -1.2 | - |
| BC036527     | CTAGE family pseudogene                                                                   | CTAGEP       | -1.2 | - |
| NM_182597    | Hypothetical protein FLJ39575                                                             | FLJ39575     | -1.2 | - |
| BC048794     | LOC399491 protein                                                                         | LOC399491    | -1.2 | - |
| THC2642409   | ALU1_HUMAN (P39188) Alu subfamily J sequence contamination warning entry, partial (11%)   | THC2642409   | -1.2 | - |
| A_23_P47220  | Unknown                                                                                   | A_23_P47220  | -1.1 | - |
| NM_152384    | Bardet-Biedl syndrome 5                                                                   | BBS5         | -1.1 | - |
| NR_002211    | Meis homeobox 3 pseudogene 1                                                              | MEIS3P1      | -1.1 | - |
| THC2501636   | ALU1_HUMAN (P39188) Alu subfamily J sequence contamination warning entry, partial (14%)   | THC2501636   | -1.1 | - |
| NM_001013685 | Hypothetical LOC401357                                                                    | LOC401357    | -1.1 | - |
| A_24_P144084 | Unknown                                                                                   | A_24_P144084 | -1.1 | - |
| NM_017881    | Chromosome 9 open reading frame 95                                                        | C9orf95      | -1.1 | - |
| A_24_P587882 | Unknown                                                                                   | A_24_P587882 | 1.1  | - |
| NM_152734    | Chromosome 6 open reading frame 89                                                        | C6orf89      | 1.1  | - |
| XR_018118    | PREDICTED: Homo sapiens similar to eukaryotic translation initiation factor 3, subunit 12 | LOC134505    | 1.1  | - |
| XR_017130    | PREDICTED: Similar to ribosomal protein L4                                                | LOC158345    | 1.1  | - |
| NM_022756    | Chromosome 1 open reading frame 149                                                       | C1orf149     | 1.1  | - |
| NM_024051    | Chromosome 7 open reading frame 24                                                        | C7orf24      | 1.1  | - |
| THC2526410   | Q9BUZ3_HUMAN (Q9BUZ3) QARS protein (Fragment), partial (25%)                              | THC2526410   | 1.2  | - |
| NM_032026    | TatD DNase domain containing 1                                                            | TATDN1       | 1.2  | - |
| AB028946     | mRNA for KIAA1023 protein, partial cds                                                    | IQCE         | 1.2  | - |
| XR_019441    | PREDICTED: Similar to phosducin-like 3                                                    | LOC644850    | 1.2  | - |
| CB987747     | AGENCOURT_13631433 NIH_MGC_184                                                            | CB987747     | 1.2  | - |
| AK057596     | hypothetical protein LOC150759                                                            | LOC150759    | 1.2  | - |
| NM_018530    | Gasdermin-like                                                                            | GSDML        | 1.2  | - |
| A_24_P204015 | Unknown                                                                                   | A_24_P204015 | 1.2  | - |
| A_24_P58597  | Unknown                                                                                   | A_24_P58597  | 1.2  | - |
| NM_032853    | Melanoma associated antigen (mutated) 1                                                   | MUM1         | 1.2  | - |
| NM_152499    | Coiled-coil domain containing 24                                                          | CCDC24       | 1.2  | - |

|                 |                                                                                             |              |     |      |
|-----------------|---------------------------------------------------------------------------------------------|--------------|-----|------|
| NM_017867       | Chromosome 4 open reading frame 27                                                          | C4orf27      | 1.2 | -    |
| A_24_P467805    | Unknown                                                                                     | A_24_P467805 | 1.2 | -    |
| NM_032860       | LTV1 homolog                                                                                | LTV1         | 1.2 | -    |
| AF462442        | HEAT repeat containing 3                                                                    | HEATR3       | 1.2 | -    |
| A_24_P306754    | Unknown                                                                                     | A_24_P306754 | 1.2 | -    |
| NM_018024       | Chromosome 8 open reading frame 32                                                          | C8orf32      | 1.2 | -    |
| NM_152261       | Chromosome 12 open reading frame 23                                                         | C12orf23     | 1.3 | -    |
| NM_032890       | Dispatched homolog 1                                                                        | DISP1        | 1.3 | -    |
| THC2669419      | ALU7_HUMAN (P39194) Alu subfamily SQ sequence<br>contamination warning entry, partial (13%) | THC2669419   | 1.3 | -    |
| NR_003110       | Chaperonin containing TCP1, subunit 6A (zeta 1)<br>pseudogene 1                             | CCT6AP1      | 1.3 | -    |
| NM_022338       | Chromosome 11 open reading frame 24                                                         | C11orf24     | 1.3 | -    |
| NM_024598       | Chromosome 16 open reading frame 57                                                         | C16orf57     | 1.3 | -    |
| AK126242        | cDNA FLJ44254 fis, clone TKIDN2009641                                                       | AK126242     | 1.3 | -    |
| NM_016472       | Chromosome 14 open reading frame 129                                                        | *C14orf129   | 1.3 | -    |
| BC036246        | Hypothetical protein FLJ32549                                                               | FLJ32549     | 1.4 | -    |
| A_24_P349756    | Unknown                                                                                     | A_24_P349756 | 1.4 | -    |
| ENST00000359244 | cDNA FLJ31209 fis, clone KIDNE2003377                                                       | LOC645332    | 1.4 | -    |
| NM_020179       | Chromosome 11 open reading frame 75                                                         | C11orf75     | 1.4 | -    |
| AK021933        | cDNA FLJ11871 fis, clone HEMBA1007052                                                       | AK021933     | 1.4 | -    |
| NM_032822       | Hypothetical protein FLJ14668                                                               | FLJ14668     | 1.4 | -    |
| BC028174        | cDNA clone IMAGE:5415767, with apparent retained<br>intron                                  | BC028174     | 1.5 | -    |
| BU153693        | AGENCOURT_7782569 NIH_MGC_67                                                                | BU153693     | 1.5 | -    |
| NM_016575       | 5'-nucleotidase domain containing 3                                                         | NT5DC3       | 1.5 | -    |
| AA687964        | cDNA clone IMAGE:1220127 3'                                                                 | AA687964     | 1.5 | -    |
| ENST00000258884 | cDNA FLJ35439 fis, clone SMINT2002899                                                       | FAM108C1     | 1.5 | -    |
| BC010126        | cDNA clone IMAGE:3948082, partial cds                                                       | BC010126     | 1.6 | -    |
| ENST00000369562 | Uncharacterized protein C6orf165                                                            | C6orf165     | 1.6 | -    |
| NM_178508       | Chromosome 6 open reading frame 1                                                           | *C6orf1      | 1.6 | -    |
| NM_001011537    | Forty-two-three domain containing 1                                                         | FYTTD1       | 1.6 | -    |
| NM_032331       | Hypothetical protein MGC2408                                                                | MGC2408      | 1.7 | -    |
| NM_001010922    | Chromosome 1 open reading frame 178                                                         | C1orf178     | 1.8 | -    |
| NM_001012423    | Golgi autoantigen, golgin subfamily a, 8E                                                   | GOLGA8E      | 2.4 | -    |
| AK056971        | cDNA FLJ32409 fis, clone SKMUS2000468                                                       | hCG_2019139  | 6.5 | -    |
| THC2645879      | Unknown                                                                                     | THC2645879   | -   | -1.6 |

|                 |                                                                                                     |                 |   |      |
|-----------------|-----------------------------------------------------------------------------------------------------|-----------------|---|------|
| ENST00000331849 | CDNA FLJ20581 fis, clone REC00491                                                                   | FLJ20581        | - | -1.6 |
| NM_015683       | Arrestin domain containing 2                                                                        | ARRDC2          | - | -1.5 |
| THC2575678      | Q753E4_ASHGO (Q753E4) AFR372Wp, partial (3%)                                                        | THC2575678      | - | -1.5 |
| AL833655        | mRNA; cDNA DKFZp667O0320                                                                            | AL833655        | - | -1.5 |
| THC2632909      | Q6E5T4_FUGRU (Q6E5T4) Claudin 2, partial (5%)                                                       | THC2632909      | - | -1.4 |
| ENST00000372602 | NB thymosin beta (Thymosin-like protein 8)                                                          | TMSL8           | - | -1.4 |
| CR933606        | mRNA; cDNA DKFZp686M08106                                                                           | C20orf80        | - | -1.4 |
| THC2678509      | Unknown                                                                                             | THC2678509      | - | -1.3 |
| NM_001039846    | Chromosome 19 open reading frame 36                                                                 | C19orf36        | - | -1.3 |
| A_24_P936845    | Unknown                                                                                             | A_24_P936845    | - | -1.2 |
| NM_199045       | Hypothetical LOC440248                                                                              | LOC440248       | - | -1.2 |
| AL050061        | mRNA; cDNA DKFZp566J123                                                                             | LOC157562       | - | -1.2 |
| ENST00000306502 | ZN778_HUMAN Isoform 2 of Q96MU6                                                                     | ZNF778          | - | -1.2 |
| AK131409        | cDNA FLJ16515 fis, clone MESAN2015501, moderately similar to Zinc finger protein 91                 | LOC284371       | - | -1.1 |
| A_24_P534290    | Unknown                                                                                             | A_24_P534290    | - | 1.1  |
| XR_018094       | PREDICTED: Homo sapiens similar to Histone-binding protein RBBP4 (Retinoblastoma-binding protein 4) | LOC442223       | - | 1.2  |
| ENST00000259969 | Nucleolar protein 7 (Nucleolar protein of 27 kDa)                                                   | NOL7            | - | 1.2  |
| THC2628527      | IRO548013 HMG20A {Homo sapiens} (exp=-1; wgp=0; cg=0), partial (35%)                                | THC2628527      | - | 1.2  |
| NM_017822       | Chromosome 12 open reading frame 41                                                                 | C12orf41        | - | 1.3  |
| NM_016305       | Synovial sarcoma translocation gene on chromosome 18-like 2                                         | SS18L2          | - | 1.3  |
| XR_017103       | PREDICTED: Homo sapiens similar to Brain protein I3 (pRGR2)                                         | LOC441630       | - | 1.3  |
| AK022297        | cDNA FLJ12235 fis, clone MAMMA1001243                                                               | AK022297        | - | 1.3  |
| NM_144703       | LSM14B, SCD6 homolog B                                                                              | LSM14B          | - | 1.4  |
| ENST00000361259 | FKSG73                                                                                              | ENST00000361259 | - | 1.4  |
| BC006438        | cDNA clone MGC:13162 IMAGE:3010103, complete cds                                                    | BC006438        | - | 1.4  |
| XR_018407       | PREDICTED: Homo sapiens similar to ADP                                                              | LOC222005       | - | 1.5  |
| BC001725        | KIAA0258                                                                                            | KIAA0258        | - | 1.5  |

Data as shown are the average fold changes within each age group. Old, n=8; Young, n=8. †Common name is the gene identifier. \*Transcript represented by multiple probesets.
